# Supplementary material for: The Immature Reticulocyte Fraction (IRF) in the Sysmex XN-1000V Analyzer Can Differentiate between Causes of Regenerative and Non-Regenerative Anemia in Dogs and Cats
Source: MDPI journal article supplement (doi:10.3390/ani14020349), 2024-01-22
Supplement: s1 [file s1]

**Supplementary Table S1.** Correlations between erythrocytic and reticulocyte parameters in anemic dogs (A) and anemic cats (B).

**(A)**

|         | <b>RBC<br/>(10<sup>6</sup>/μL)</b> | <b>Hb<br/>(g/dL)</b> | <b>HCT<br/>(%)</b> | <b>MCV<br/>(fL)</b> | <b>MCH<br/>(pg)</b> | <b>MCHC<br/>(g/dL)</b> | <b>RDW<br/>(fL)</b> | <b>RET<br/>(10<sup>6</sup>/μL)</b> | <b>LFR<br/>(%)</b> | <b>MFR<br/>(%)</b> | <b>HFR<br/>(%)</b> | <b>IRF<br/>(%)</b> |
|---------|------------------------------------|----------------------|--------------------|---------------------|---------------------|------------------------|---------------------|------------------------------------|--------------------|--------------------|--------------------|--------------------|
| LFR (%) | 0.25                               | 0.20                 | 0.19               | - 0.19              | - 0.11              | 0.09                   | - 0.27              | - 0.54                             | 1.00               | - 0.68             | - 0.95             | - 1.00             |
| MFR (%) | 0.00                               | 0.02                 | 0.00               | - 0.01              | 0.01                | 0.04                   | 0.17                | 0.48                               | - 0.68             | 1.00               | 0.45               | 0.68               |
| HFR (%) | - 0.28                             | - 0.23               | - 0.21             | 0.23                | 0.14                | - 0.13                 | 0.26                | 0.47                               | - 0.95             | 0.45               | 1.00               | 0.95               |
| IRF (%) | - 0.25                             | - 0.20               | - 0.19             | 0.187               | 0.12                | -0.09                  | 0.27                | 0.54                               | - 1.00             | 0.68               | 0.95               | 1.00               |

Data are expressed as Spearman's rank correlation coefficient (ρ). Hb, hemoglobin concentration; HCT, hematocrit; HFR, high fluorescence reticulocytes; IRF, immature reticulocyte fraction; LFR, low fluorescence reticulocytes; MCH, mean corpuscular hemoglobin; MCHC, mean corpuscular hemoglobin concentration; MCV, mean corpuscular volume; MFR, medium fluorescence reticulocytes; RBC, red blood cell count; RDW, red blood cell distribution width; RET, absolute reticulocyte count.

**(B)**

|         | <b>RBC<br/>(10<sup>6</sup>/μL)</b> | <b>Hb<br/>(g/dL)</b> | <b>HCT<br/>(%)</b> | <b>MCV<br/>(fL)</b> | <b>MCH<br/>(pg)</b> | <b>MCHC<br/>(g/dL)</b> | <b>RDW<br/>(fL)</b> | <b>RET<br/>(10<sup>6</sup>/μL)</b> | <b>LFR<br/>(%)</b> | <b>MFR<br/>(%)</b> | <b>HFR<br/>(%)</b> | <b>IRF<br/>(%)</b> |
|---------|------------------------------------|----------------------|--------------------|---------------------|---------------------|------------------------|---------------------|------------------------------------|--------------------|--------------------|--------------------|--------------------|
| LFR (%) | 0.21                               | 0.26                 | 0.24               | - 0.09              | - 0.08              | 0.01                   | - 0.08              | - 0.21                             | 1.00               | -0.27              | - 0.95             | - 1.00             |
| MFR (%) | - 0.19                             | - 0.18               | - 0.17             | 0.10                | 0.07                | 0.01                   | 0.15                | 0.01                               | - 0.27             | 1.00               | - 0.03             | 0.27               |
| HFR (%) | - 0.16                             | - 0.21               | - 0.20             | 0.07                | 0.06                | - 0.01                 | 0.04                | 0.22                               | - 0.95             | -0.03              | 1.00               | 0.95               |
| IRF (%) | - 0.21                             | - 0.26               | - 0.24             | 0.09                | 0.08                | - 0.01                 | 0.08                | 0.21                               | - 1.00             | 0.27               | 0.95               | 1.00               |

Data are expressed as Pearson correlation coefficient (r). Hb, hemoglobin concentration; HCT, hematocrit; HFR, high fluorescence reticulocytes; IRF, immature reticulocyte fraction; LFR, low fluorescence reticulocytes; MCH, mean corpuscular hemoglobin; MCHC, mean corpuscular hemoglobin concentration; MCV, mean corpuscular volume; MFR, medium fluorescence reticulocytes; RBC, red blood cell count; RDW, red blood cell distribution width; RET, absolute reticulocyte count.

**Supplementary Table S2.** Reticulocyte parameters in healthy (a) dogs and (b) cats grouped by age.

**(A)**

| Parameter                 | Healthy dogs                |                                |                               |
|---------------------------|-----------------------------|--------------------------------|-------------------------------|
|                           | Group 1: < 1 yo<br>(n= 297) | Group 2: 1-10 yo<br>(n = 1625) | Group 3: > 10 yo<br>(n = 732) |
| RET (10 <sup>3</sup> /μL) | 62.6 (60)                   | 64.3 (55)                      | 58.1 (57)                     |
| LFR (%)                   | 77.9 (14)                   | 77.1 (16)                      | 77.6 (15)                     |
| MFR (%)                   | 11.0 (7.9)                  | 10.1 (6.9)                     | 9.7 (6.4)                     |
| HFR (%)                   | 11.9 (10)                   | 12.4 (11)                      | 12.2 (10)                     |
| IRF (%)                   | 22.1 (16)                   | 22.9 (14)                      | 22.4 (15)                     |

Data are expressed as median (IQR, interquartile range). HFR, high fluorescence reticulocytes; IRF, immature reticulocyte fraction; LFR, low fluorescence reticulocytes; MFR, medium fluorescence reticulocytes; RET, absolute reticulocyte count.

**(B)**

| Parameter                 | Healthy cats               |                               |                               |
|---------------------------|----------------------------|-------------------------------|-------------------------------|
|                           | Group 1: < 1 yo<br>(n= 31) | Group 2: 1-10 yo<br>(n = 168) | Group 3: > 10 yo<br>(n = 194) |
| RET (10 <sup>3</sup> /μL) | 15.4 (16)                  | 18.7 (24)                     | 15.5 (17)                     |
| LFR (%)                   | 77.1 ± 13                  | 64.1 ± 16 <sup>1</sup>        | 62.4 ± 17 <sup>1</sup>        |
| MFR (%)                   | 9.4 ± 4.9                  | 12.1 ± 4.9 <sup>1</sup>       | 10.9 ± 4.7                    |
| HFR (%)                   | 11.3 (10)                  | 21.2 (11) <sup>1</sup>        | 22.1 (24) <sup>1</sup>        |
| IRF (%)                   | 22.8 ± 13                  | 35.8 ± 16 <sup>1</sup>        | 37.6 ± 17 <sup>1</sup>        |

Data are expressed as median (IQR, interquartile range) or mean ± standard deviation (SD), according to distribution. HFR, high fluorescence reticulocytes; IRF, immature reticulocyte fraction; LFR, low fluorescence reticulocytes; MFR, medium fluorescence reticulocytes; RET, absolute reticulocyte count. <sup>1</sup>  $p < 0.05$  vs. Group 1.

**Supplementary Table S3.** Reticulocyte parameters in (a) dogs and (b) cats grouped by sex.

**(A)**

| Parameter                 | Healthy dogs        |                    |
|---------------------------|---------------------|--------------------|
|                           | Female<br>(n= 1443) | Male<br>(n = 1211) |
| RET (10 <sup>3</sup> /μL) | 65.4 (57)           | 58.3 (57)          |
| LFR (%)                   | 76.7 (15)           | 78.0 (15)          |
| MFR (%)                   | 10.4 (6.6)          | 9.7 (7.2)          |
| HFR (%)                   | 12.6 (10)           | 11.8 (11)          |
| IRF (%)                   | 23.3 (15)           | 22.0 (15)          |

Data are expressed as median (IQR, interquartile range). HFR, high fluorescence reticulocytes; IRF, immature reticulocyte fraction; LFR, low fluorescence reticulocytes; MFR, medium fluorescence reticulocytes; RET, absolute reticulocyte count.

**(B)**

| Parameter                 | Healthy cats       |                   |
|---------------------------|--------------------|-------------------|
|                           | Female<br>(n= 229) | Male<br>(n = 164) |
| RET (10 <sup>3</sup> /μL) | 15.2 (17)          | 18.6 (25)         |
| LFR (%)                   | 66.7 (27)          | 66.8 (26)         |
| MFR (%)                   | 11.2 ± 4.9         | 11.4 ± 4.7        |
| HFR (%)                   | 20.6 (22)          | 21.3 (21)         |
| IRF (%)                   | 33.3 (27)          | 33.1 (26)         |

Data are expressed as median (IQR, interquartile range) or mean ± standard deviation (SD), according to distribution. HFR, high fluorescence reticulocytes; IRF, immature reticulocyte fraction; LFR, low fluorescence reticulocytes; MFR, medium fluorescence reticulocytes; RET, absolute reticulocyte count.

(B)

| Parameter                 | Healthy cats               |                               |                               |
|---------------------------|----------------------------|-------------------------------|-------------------------------|
|                           | Group 1: < 5 yo<br>(n= 77) | Group 2: 5-10 yo<br>(n = 122) | Group 3: > 10 yo<br>(n = 194) |
| ARC (10 <sup>3</sup> /μL) | 17.1 (22)                  | 17.7 (24)                     | 15.5 (17)                     |
| LFR (%)                   | 69.1 ± 14                  | 64.3 ± 17                     | 62.4 ± 17 <sup>1</sup>        |
| MFR (%)                   | 11.6 ± 5.2                 | 11.7 ± 6.0                    | 10.9 ± 4.7                    |
| HFR (%)                   | 16.7 (16)                  | 20.7 (22)                     | 22.1 (24) <sup>1</sup>        |
| IRF (%)                   | 30.8 ± 14                  | 35.7 ± 17                     | 37.6 ± 17 <sup>1</sup>        |

Data are expressed as median (IQR, interquartile range) or mean ± standard deviation (SD), according to distribution. ARC, absolute reticulocyte count; HFR, high fluorescence reticulocytes; IRF, immature reticulocyte fraction; LFR, low fluorescence reticulocytes; MFR, medium fluorescence reticulocytes. <sup>1</sup>  $p < 0.05$  vs. Group 1.
